# Supplementary material for: Down regulation of ADAM33 as a Predictive Biomarker of Aggressive Breast Cancer
Source: PubMed Central journal article supplement (PMC5353751; doi:10.1038/srep44414), 2017-03-15

# **Down regulation of *ADAM33* as a Predictive Biomarker of Aggressive Breast Cancer**

Graciele C. M. Manica<sup>1</sup>, Caroline F. Ribeiro<sup>1</sup>, Marco A. S. de Oliveira<sup>2</sup>, Isabela T. Pereira<sup>1</sup>, Andressa Chequin<sup>1</sup>, Edneia A. S. Ramos<sup>1</sup>, Liliane M. B. Klassen<sup>1</sup>, Ana Paula M. Sebastião<sup>3</sup>, Larissa M. Alvarenga<sup>1</sup>, Silvio M. Zanata<sup>1</sup>, Lucia De Noronha<sup>4</sup>, Iris Rabinovich<sup>5</sup>, Fabricio F. Costa<sup>6</sup>, Emanuel M. Souza<sup>7</sup>, Giseli Klassen<sup>\*1</sup>

Affiliations:

<sup>1</sup>Department of Basic Pathology, Federal University of Parana, Curitiba, Paraná, Brazil;

<sup>2</sup>Department of Biochemistry, State University of Maringa, Maringa, Brazil;

<sup>3</sup>Department of Medical Pathology, Federal University of Parana, Curitiba, Parana, Brazil;

<sup>4</sup> School of Medicine, Pontifical Catholic University of Parana

<sup>5</sup>Department of Tocogynecology, Federal University of Parana, Curitiba, Parana, Brazil;

<sup>6</sup> Genomic Sciences and Biotechnology Program, University Catholic of Brasilia, DF, Brazil;

<sup>7</sup>Department of Biochemistry and Molecular Biology, Federal University of Parana, Curitiba, Parana, Brazil,

\* Corresponding author

## Supplementary information

**Figure S1. Expression of Recombinant ADAM33 protein.** (A) The human ADAM33 protein shows the coding region of nucleotides 1586 to 2197: ADAM33-Rec encompasses part of the disintegrin and cysteine-rich domains. (B) Gel SDS/PAGE of total protein that was extracted from *E. coli* BL21Ai cells with or without arabinose to test the induction of ADAM33-Rec protein: (MW) Molecular Weight, (1) *E. coli* BL21Ai non-induction and (2) induction of ADAM33-Rec protein (27.7 kDa) expression in *E. coli* BL21Ai. (C) Western blotting (WB) with an anti-poly-histidine antibody: (MW) Molecular Weight, (1) no-induction (2) induction of the ADAM33-Rec protein (27.7 kDa) in *E. coli* BL21Ai.

**Figure S2. Purification, MALDI-TOF-MS and MS/MS analysis of ADAM33-Rec.** (A) SDS-PAGE gel shows the purification of ADAM33-Rec. Soluble extract of ADAM33-Rec protein expressed in *E. coli* BL21Ai was purified using a Hi-Trap Ni-Chelating column (GE Healthcare). The recombinant protein was eluted using an imidazole gradient (from 20 mM to 1 M). Samples were separated by SDS-PAGE and stained with Coomassie blue. (B) Peptide mass fingerprinting (PMF) of ADAM33-Rec protein. The purified protein band was in-gel digested with trypsin and analyzed by MALDI-TOF-MS/MS. Peaks were considered a match when the maximum mass deviation from calculated  $m/z$  was 0.100 Da. Sequence cover was calculated as the ratio [number of amino acids in identified peptide]/[number amino acids of ADAM33-Rec]. Identified peaks are shown in panel B together with the matching peptides. (C) Peak  $m/z$  27032.120 was subjected to MS/MS and fragmentation mass profile used for Mascot search of NCBIprot leading to the identification of human ADAM33 ( $p < 0.05$ ).



**Figure S3. ADAM33 protein expression in paraffin-embedded human lung tissue by IHC.** The IHC results are shown at X100 magnification. The primary antibody used was GMGK06, which shows a positive signal in human lung tissue (black arrows).

**Figure S4. Negative control of paraffin-embedded breast cancer tissue by IHC.** The IHC results are shown at X100 magnification. Breast cancer sample incubated without primary antibody.

**Figure S5. Kaplan-Meier curves for the time to breast cancer progression according to the ADAM33 Score.** (A) Kaplan-Meier estimates are shown for overall survival and (B) metastasis-free survival using the ADAM33 scores. Symbols on the graph lines represent censored data; *p* values are given for log-rank tests.

**Table S1. Panel of Antibody specification used in Immunohistochemical evaluation.**

| <b>Antibody</b>                                        |                                   | <b>Dilution</b> |
|--------------------------------------------------------|-----------------------------------|-----------------|
| Anti- ER, Monoclonal antibody, clone EP1               | Dako, Denmark                     | Ready to use    |
| Anti-PR, Monoclonal antibody, clone PgR 636            | Dako, Denmark                     | Ready to use    |
| Anti-Her, Monoclonal antibody, clone SP3               | Cell Marque                       | Ready to use    |
| Anti- CK 17 , Monoclonal antibody, clone E3            | Novocastra - Leica Biosystems, UK | 1:20            |
| Anti-c- <i>Ki</i> , Policlonal Anti-Rabbit Code: A4502 | Dako, Denmark                     | 1:100           |
| Anti-CK 5/6, Monoclonal antibody, clone D5/16 B4       | Dako, Denmark                     | 1:50            |
| Anti-CK 14, Monoclonal antibody, clone LL002           | Abcam, USA                        | 1:100           |
| Anti-EGFR, Monoclonal antibody, clone H11              | Dako, Denmark                     | 1:100           |
| Anti-Ki67, Monoclonal antibody, clone MIB-1            | Dako, Denmark                     | Ready to use    |

**Table S2. Time to breast cancer progression in relation to clinic pathological characteristics: Cox proportional hazards model.**

| Analysis                       | Overall survival |                |                | Metastasis Free Survival |                |                |
|--------------------------------|------------------|----------------|----------------|--------------------------|----------------|----------------|
|                                | HR               | 95 % CI        | <i>p</i> value | HR                       | 95 % CI        | <i>p</i> value |
| <b>Univariate</b>              |                  |                |                |                          |                |                |
| ADAM33<br>Score 2 vs (3 and 4) | 0.407            | 0.216 to 0.769 | <b>0.006</b>   | 0.423                    | 0.231 to 0.777 | <b>0.006</b>   |
| <b>Multivariate</b>            |                  |                |                |                          |                |                |
| ADAM33<br>Score 2 vs (3 and 4) | 0.480            | 0.230 to 0.999 | <b>0.05</b>    | 0.413                    | 0.191 to 0.895 | <b>0.025</b>   |

Multivariate Cox proportional hazards regression analyses to estimate hazard ratios (HRs) and 95% confidence intervals (95% CI) for overall survival and metastasis-free survival. All covariates with  $p < 0.05$  were retained in the final model.

**A**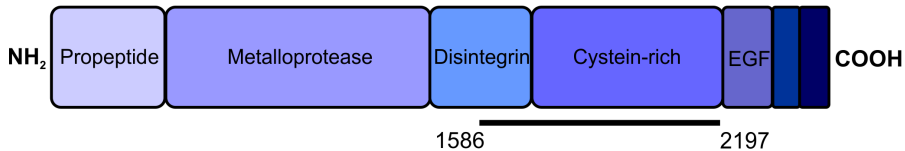**B**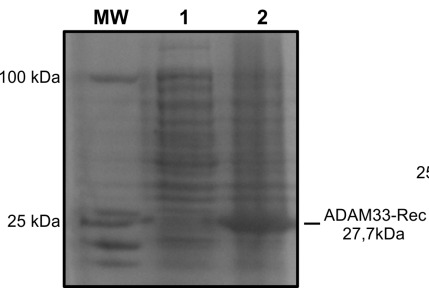**C**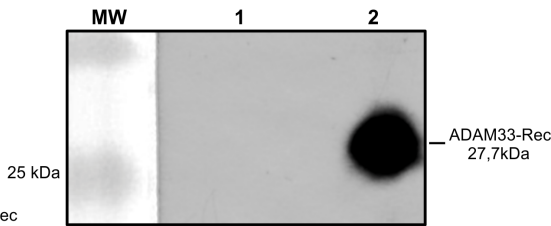

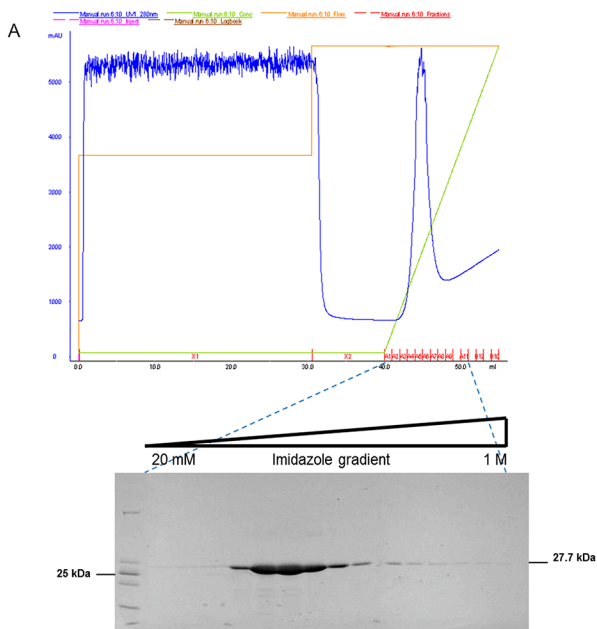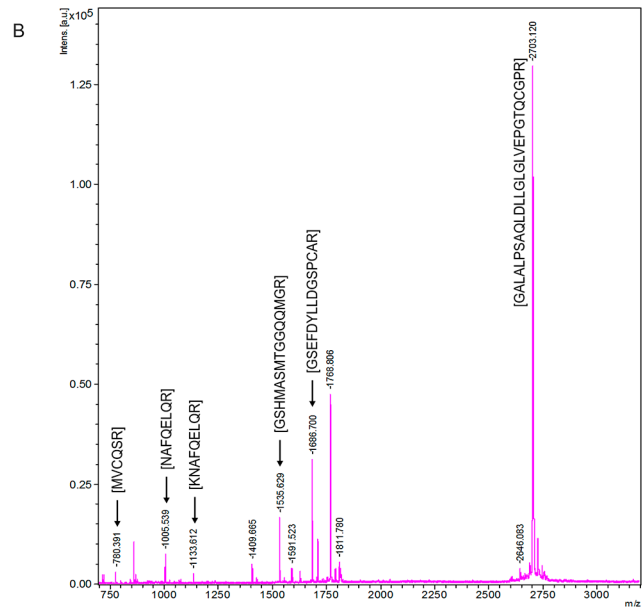

**C** ADAM metallopeptidase domain 33, isoform CRA\_d [Homo sapiens]

| Query | Observed  | Mr(expt)  | Mr(calc)  | ppm    | Miss | Score | Expect | Rank | Unique | Peptide                         |
|-------|-----------|-----------|-----------|--------|------|-------|--------|------|--------|---------------------------------|
| 1     | 2703.2661 | 2702.2588 | 2702.4425 | -67.98 | 0    | 38    | 0.078  | 1    | U      | R.GALALPSAQLDLLGLGLVEPGTCCGPR.M |

ADAM33-Rec sequence:

YLLDGSPCARGSGYCWGDGACTPLEQQCQQLWGP GSHPAEACFQVNSAGDAHGNCGQDSEGHFLPCAGRDL  
 CGKLCQCGGKPSLLAPHMVPVDSTVHLDGQEVTCR **GALALPSAQLDLLGLGLVEPGTCCGPR**MVCQSRRRCRKNAF  
 QELQRCLTACHSHGVCNSNHNCACPGWAPPFCDKPGFGGSMDSGPVQAEHNHTFL

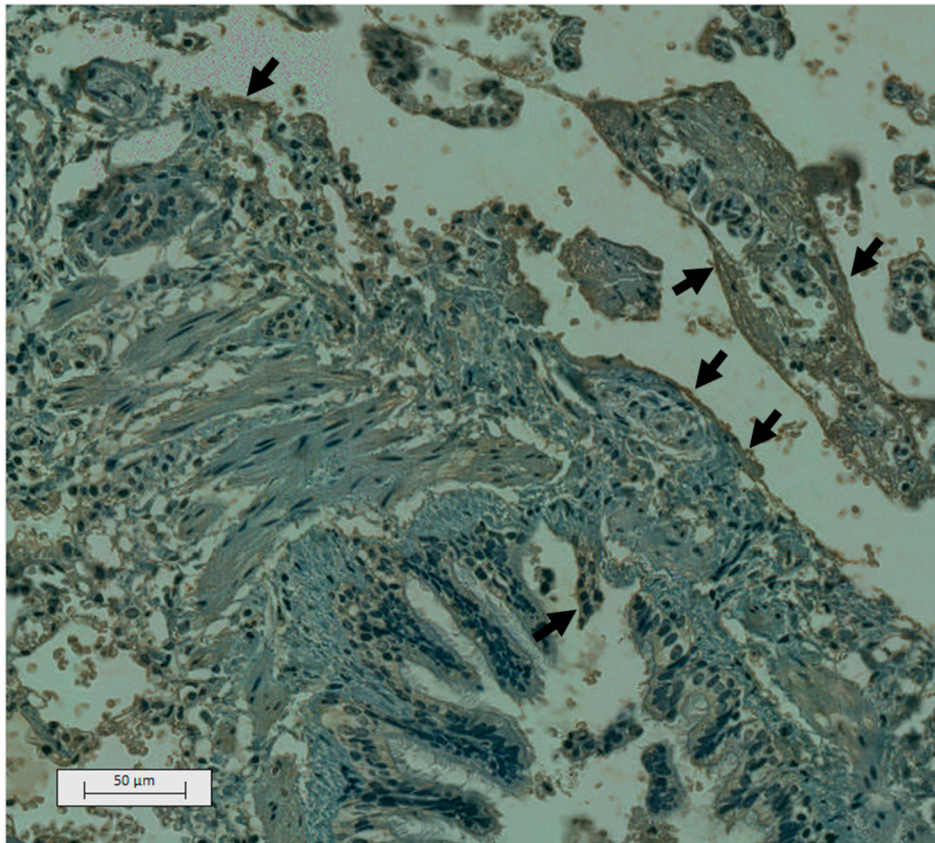

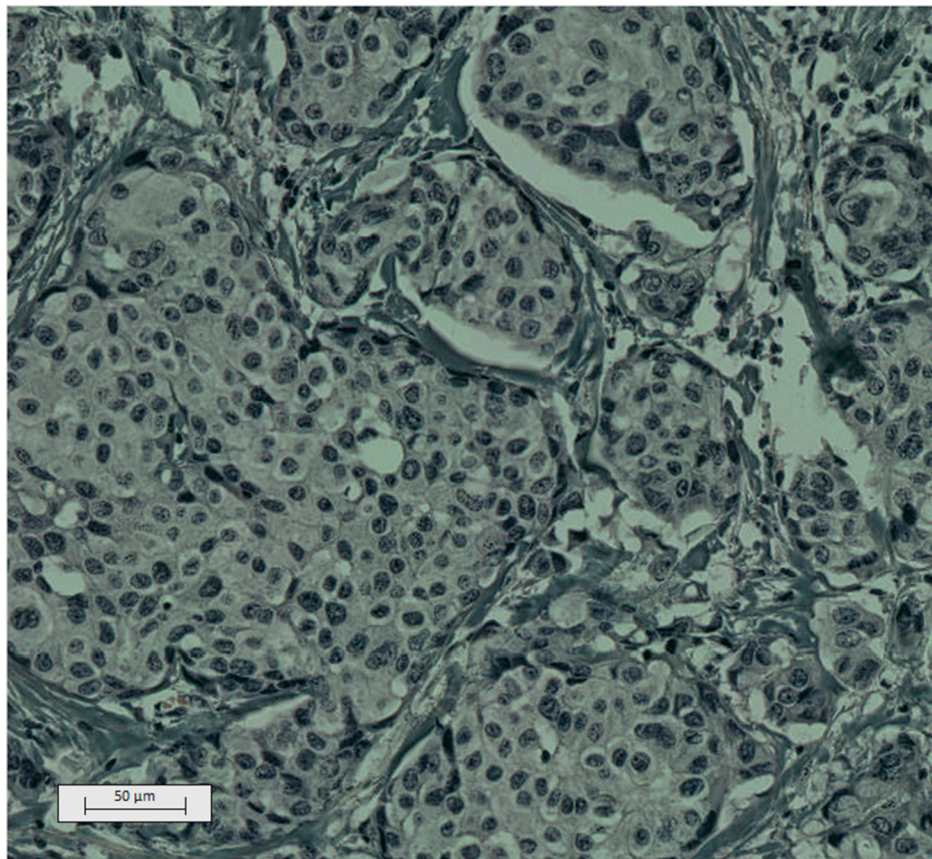

**A****ADAM33 score vs OS**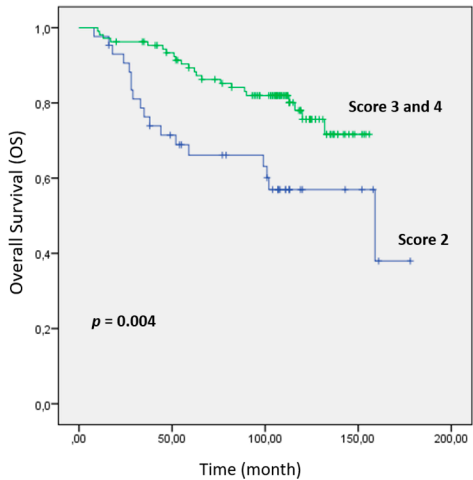**B****ADAM33 score vs MFS**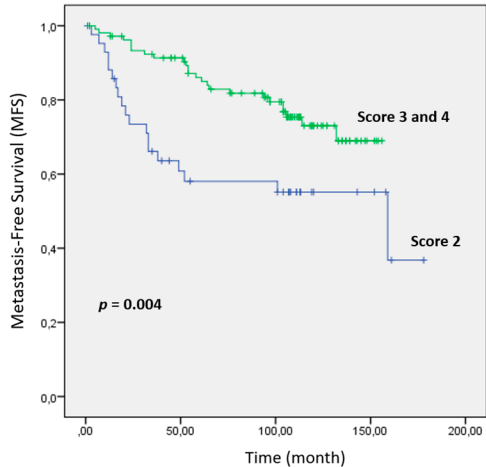

Supplement: srep44414-s1.pdf [file srep44414-s1.pdf]
